# Supplementary material for: Thyroidal expression of ER molecular chaperone GRP170 is required for efficient TSH-mediated thyroid hormone synthesis
Source: JCI journal article supplement (doi:10.1172/jci.insight.191837), 2025-09-08

Fig. 2B Control: lane 1-3; lane 7-10  
GRP170-KO: lane 4-6; lane 11-13

Lane 1-6 were shown in Fig. 2B. All lanes were quantified in Fig. 2C.  
N=6-7

Shown in figure

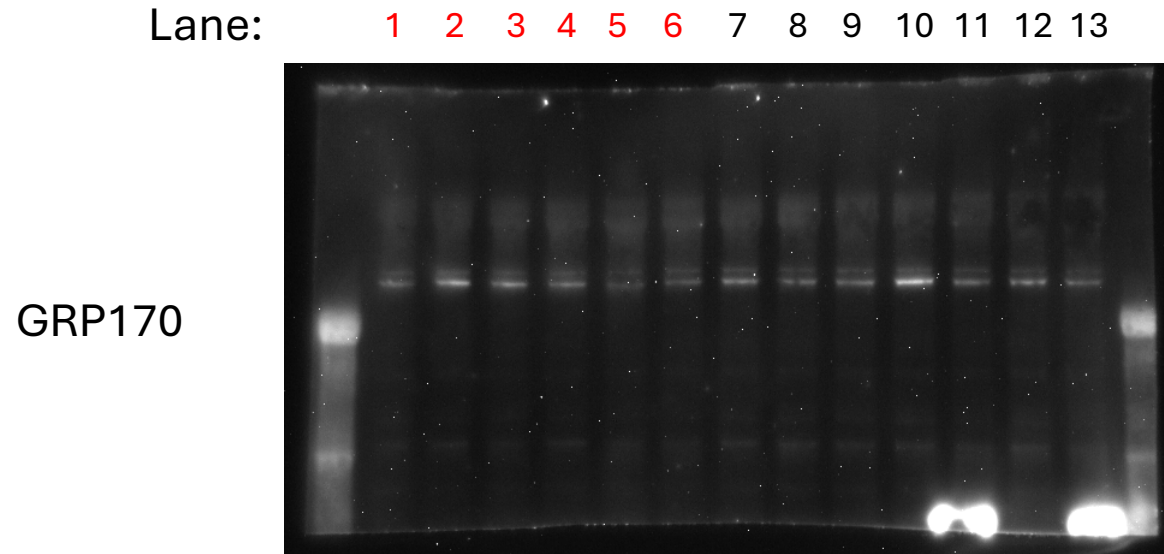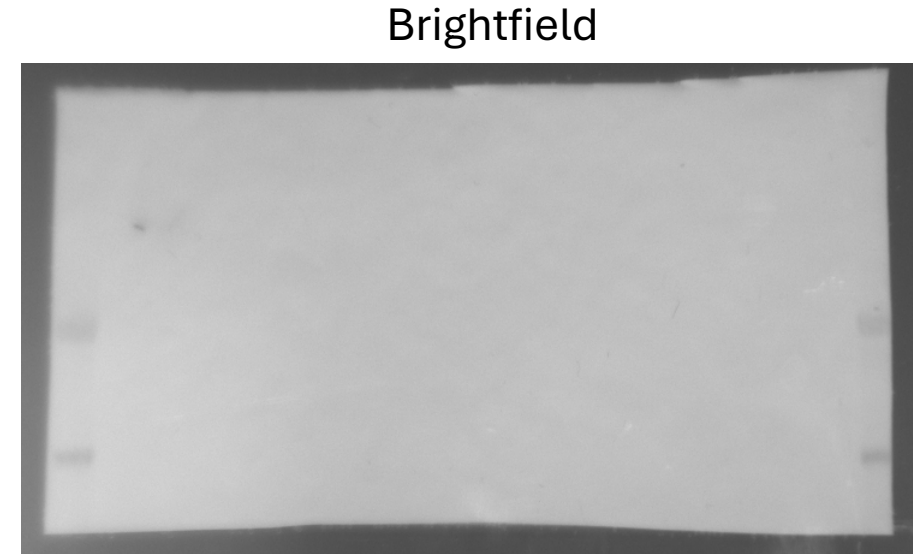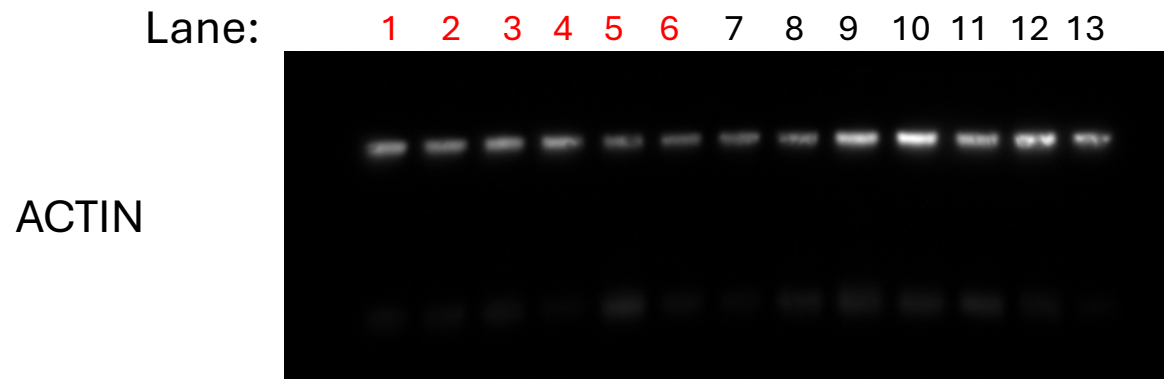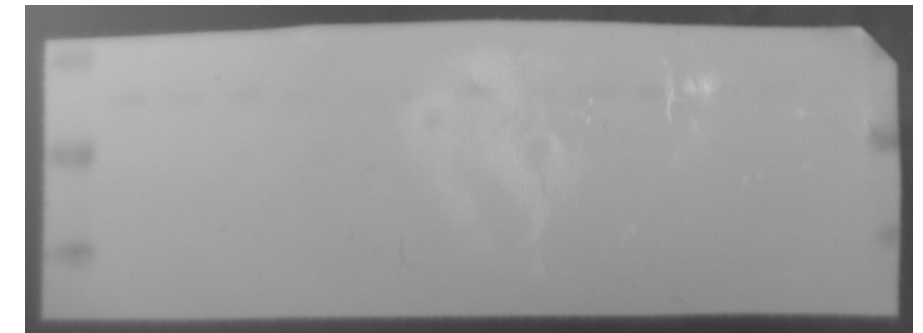

Fig. 2B, 3D and 4E were from the same gel.

Fig. 3D

Control: lane 1-4

GRP170-KO: lane 5-7

N=3-4

Shown in figure

Lane: 1 2 3 4 5 6 7

BiP

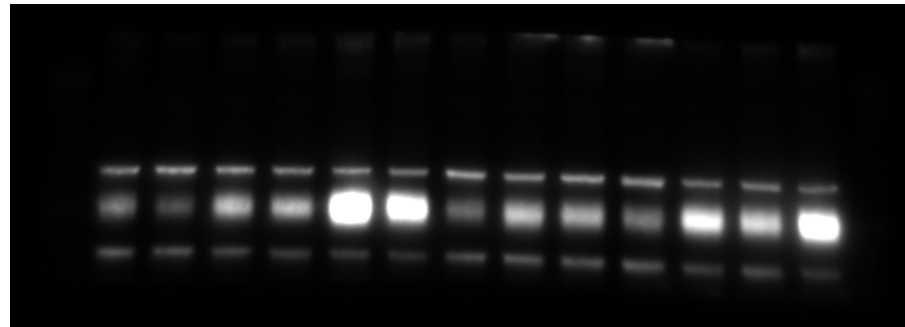

Brightfield

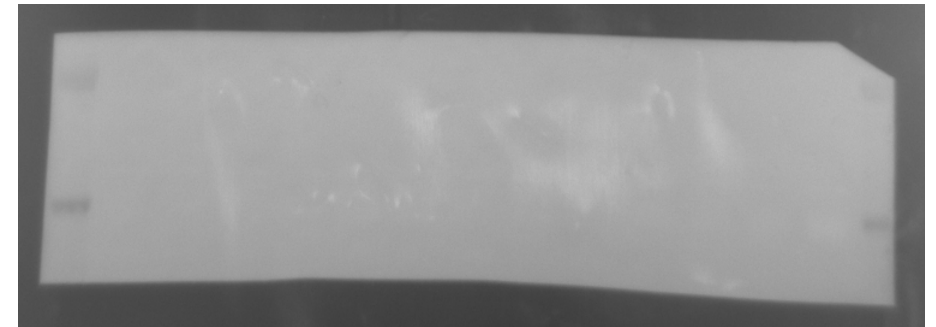

Lane: 1 2 3 4 5 6 7

ACTIN

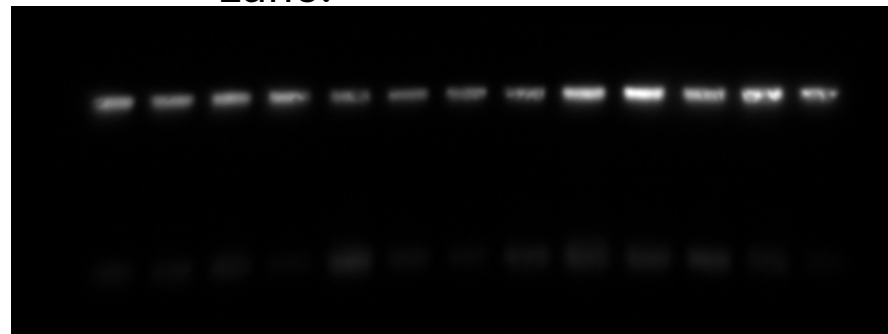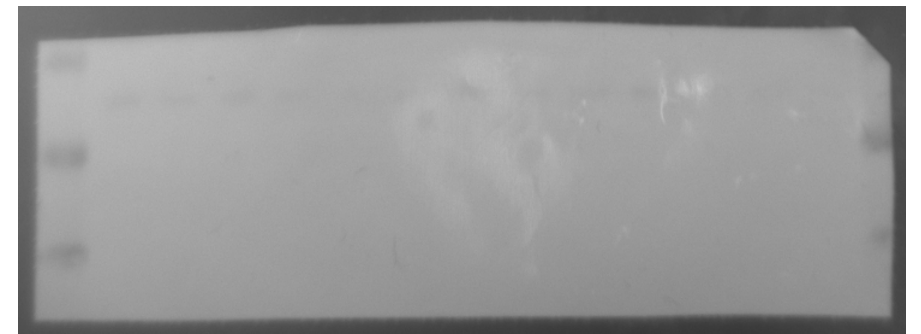

Fig. 2B, 3D and 4E were from the same gel.

Fig. 3E Control: lane 1, 2; lane 5, 6  
GRP170-KO: lane 3, 4; lane 7, 8

Mock digestion: lane 1, 3, 5, 7  
Endo H: lane 2, 4, 6, 8

Lane 5-8 were shown in Fig. 3E.  
N=4

Shown in figure

Lane: 1 2 3 4 5 6 7 8

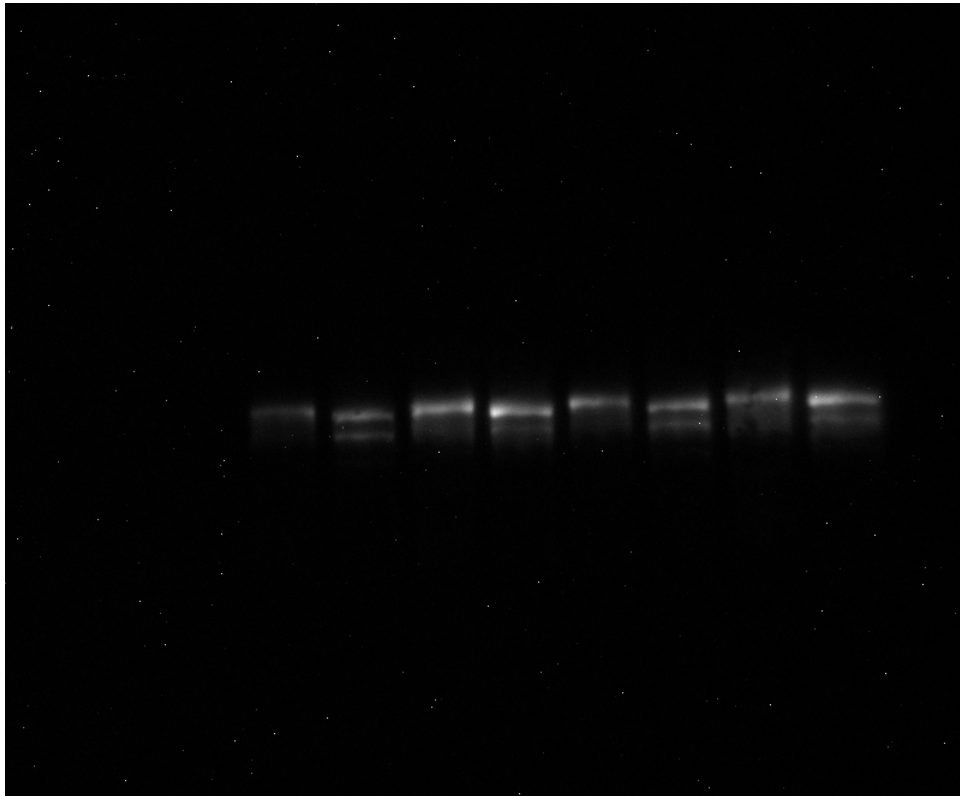

Brightfield

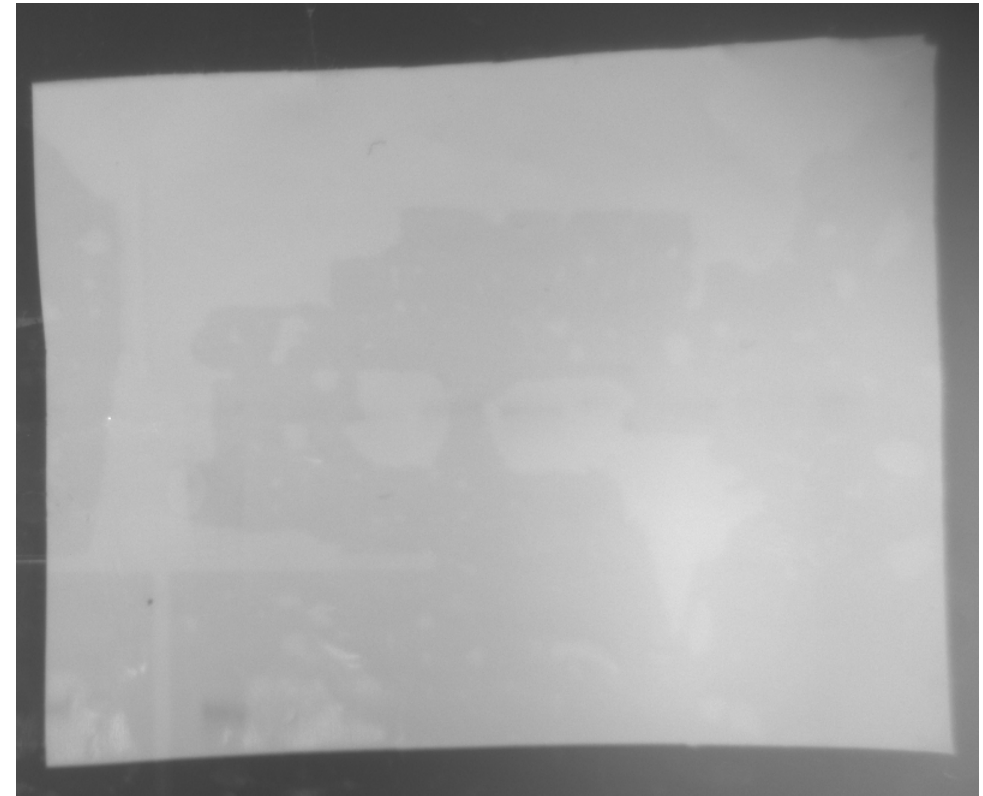

Fig. 4C

Control: lane 1-7  
GRP170-KO: lane 8-13

N=6-7

TPO

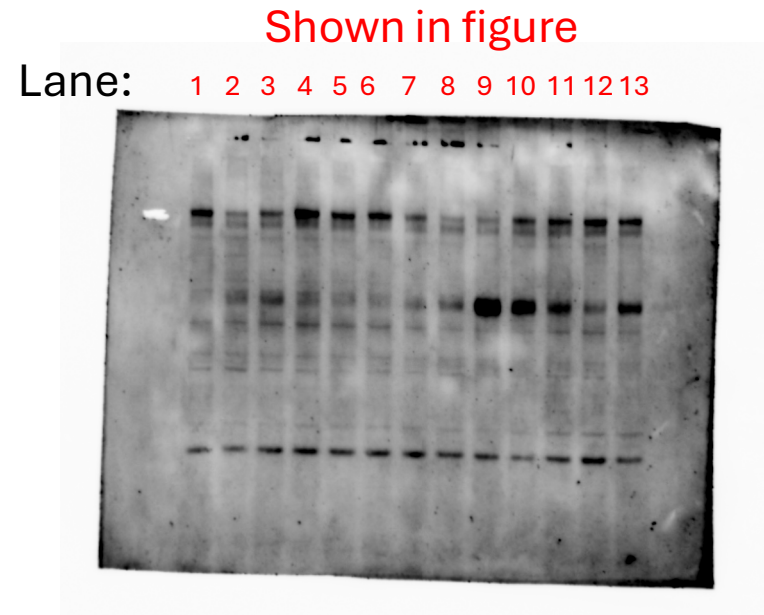

Brightfield

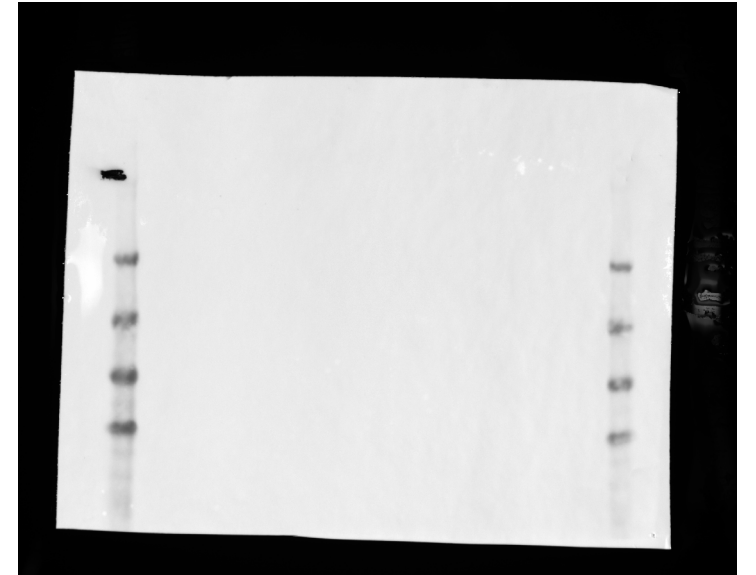

ACTIN

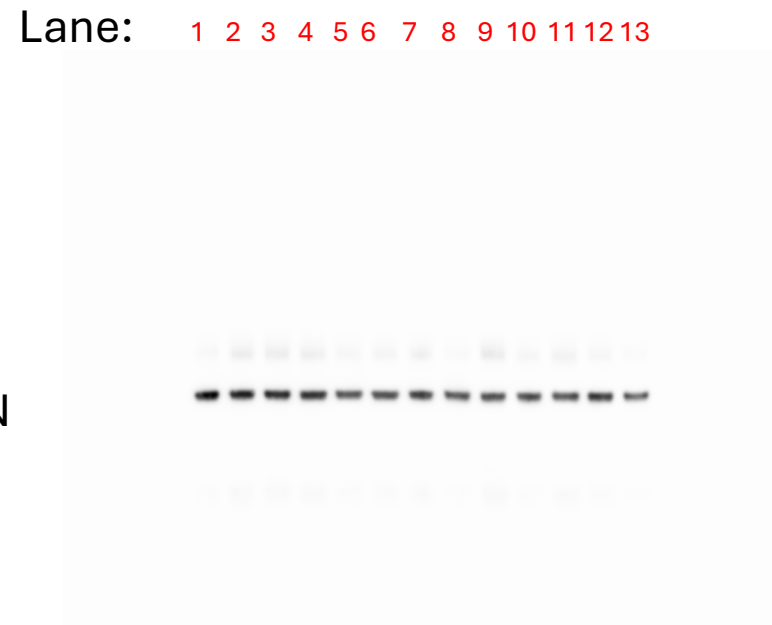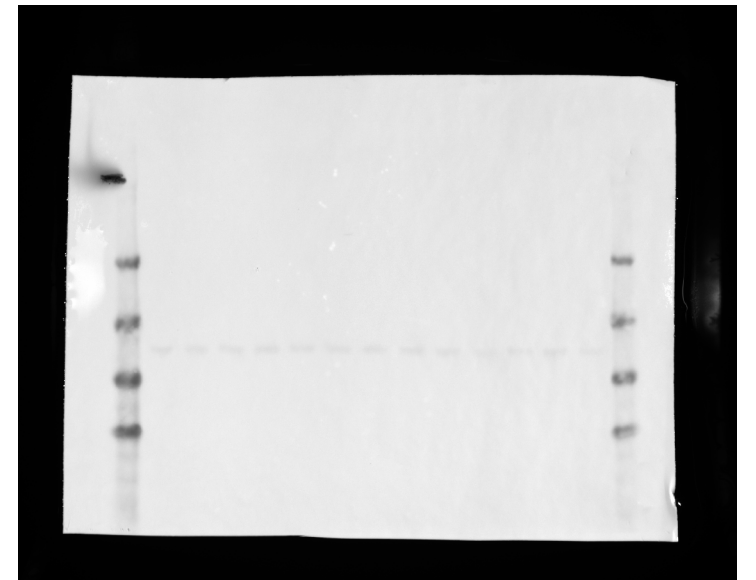

Fig. 4E Control: lane 1-3; lane 7-10  
GRP170-KO: lane 4-6; lane 11-13

Lane 1-6 were shown in Fig. 4E. All lanes were quantified in Fig. 4F.

N=6-7

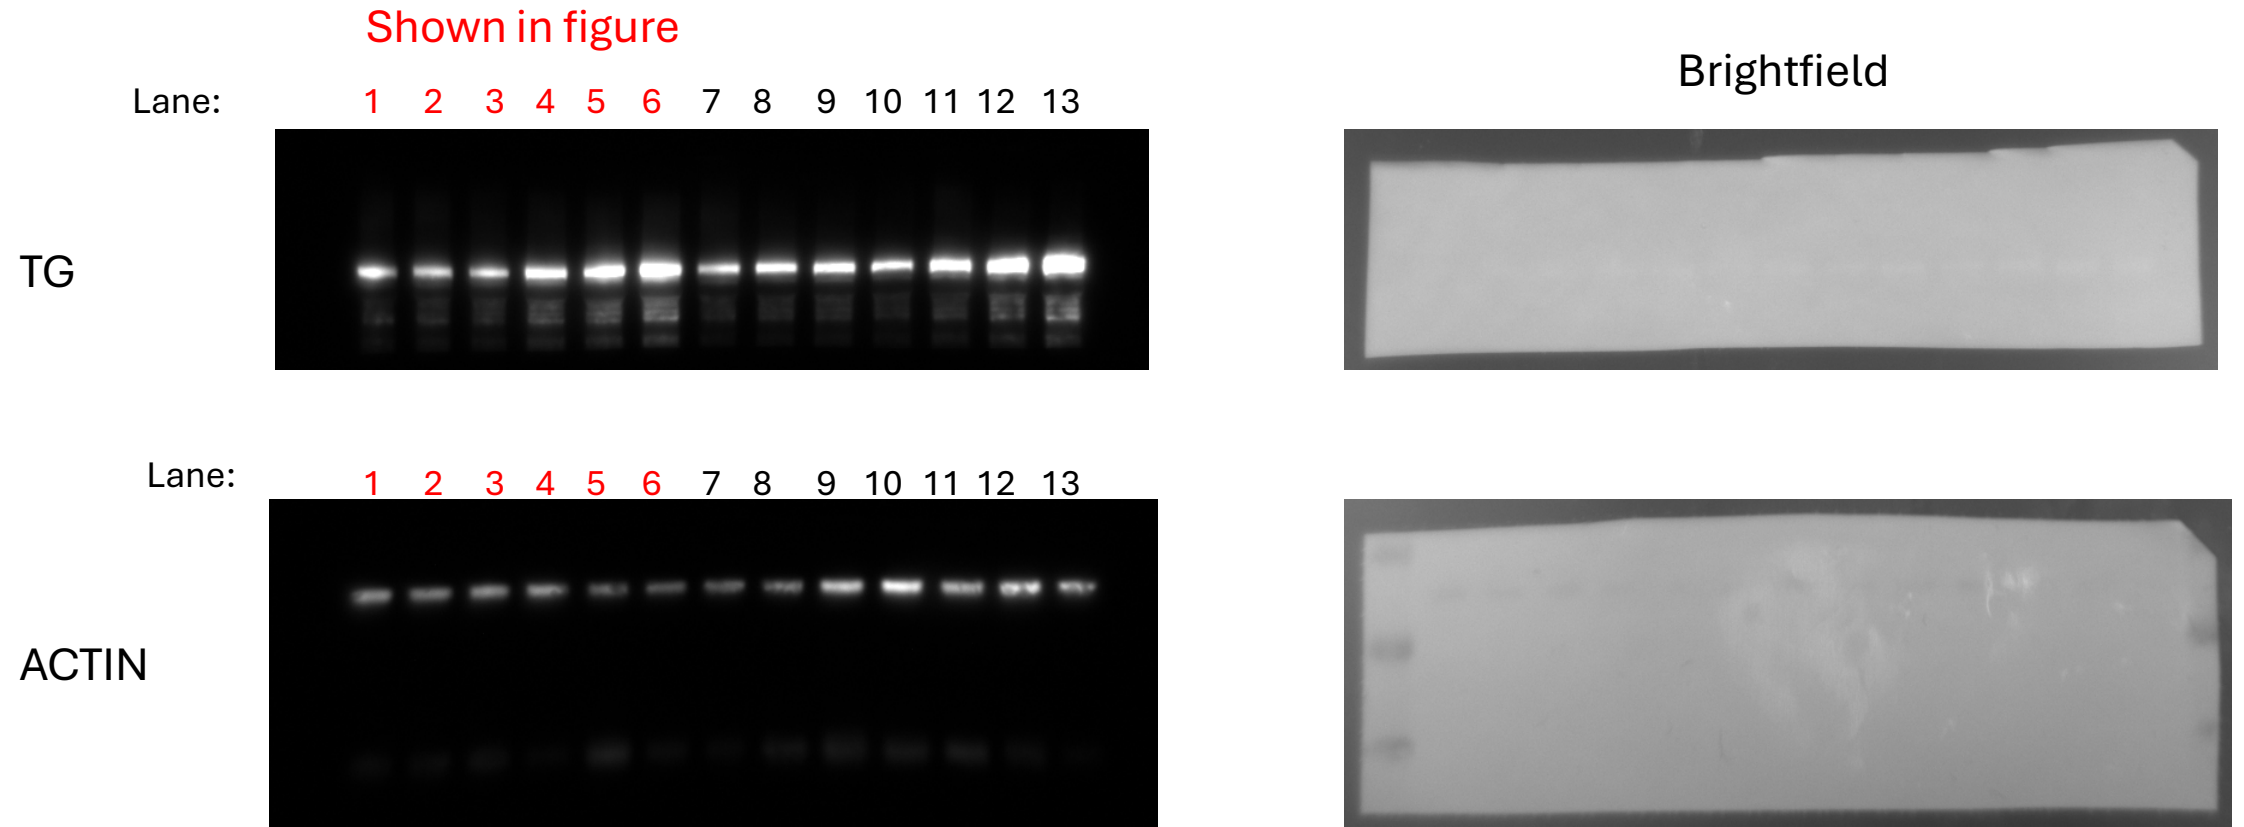

Fig. 2B, 3D and 4E were from the same gel.

Fig. 4G

Shown in figure

Lane:

1 2 3 4 5 6 7

Brightfield

Control: lane 1-4;  
GRP170-KO: lane 5-7

T4

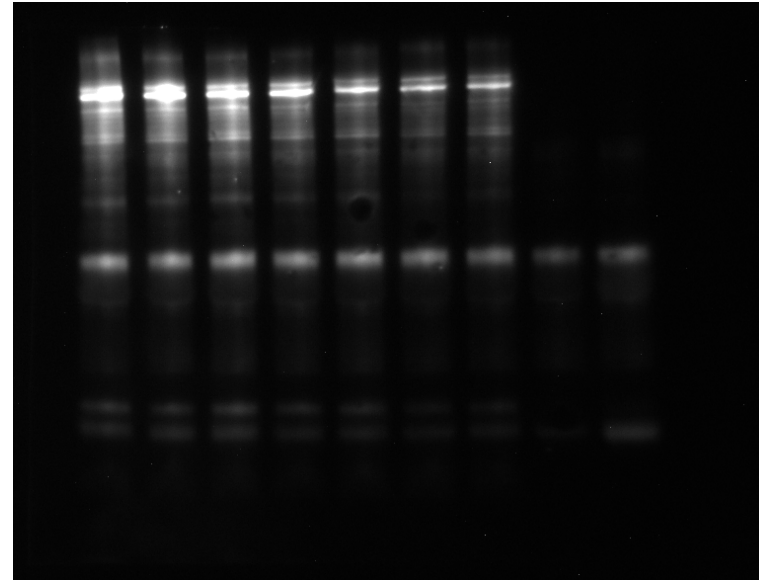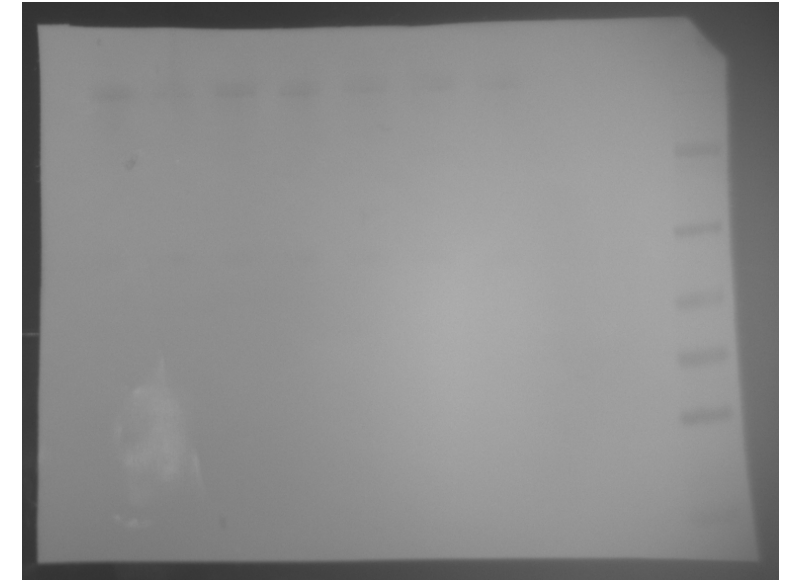

N=4-6

Lane:

1 2 3 4 5 6 7

Tg

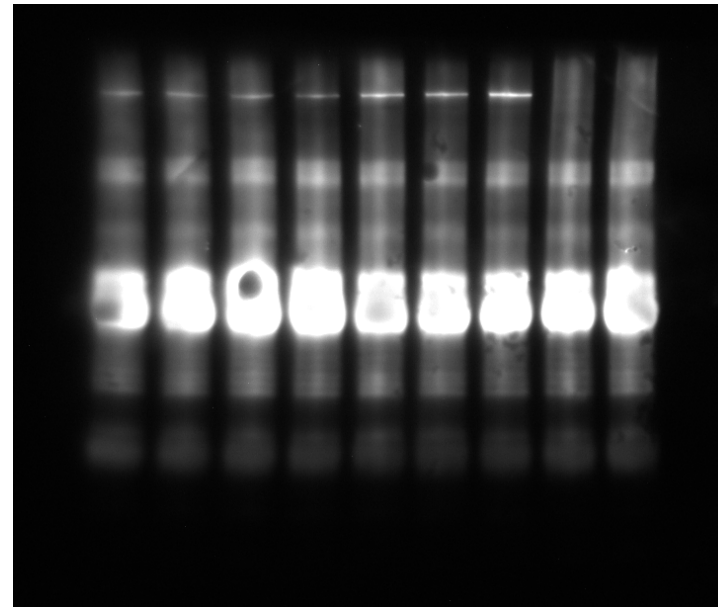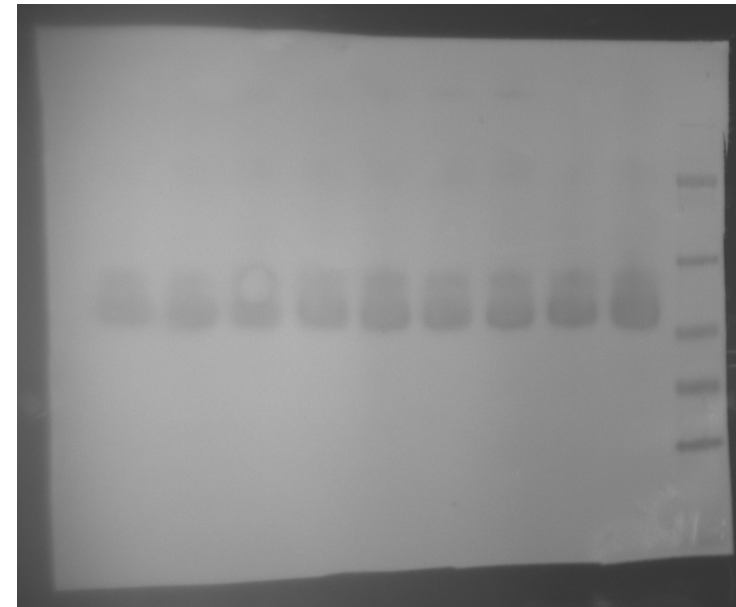

Fig. 5A

Control: lane 1-7  
GRP170-KO: lane 8-13

N=6-7

Shown in figure

Lane: 1 2 3 4 5 6 7 8 9 10 11 12 13

NIS

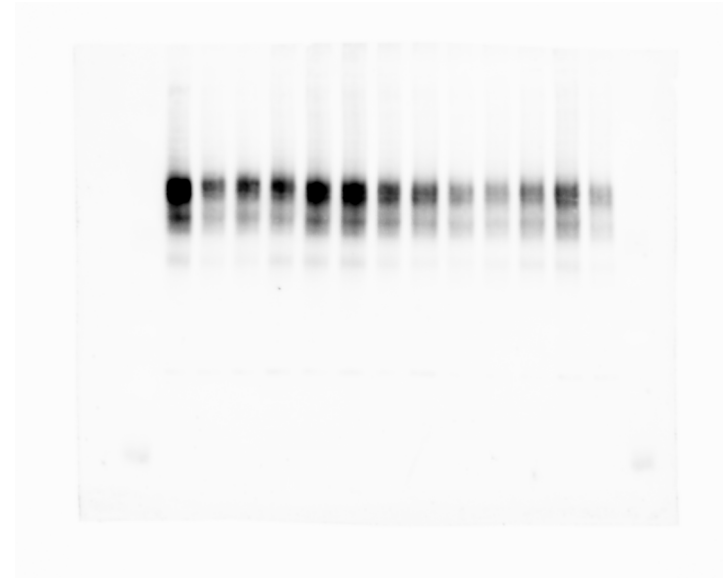

Brightfield

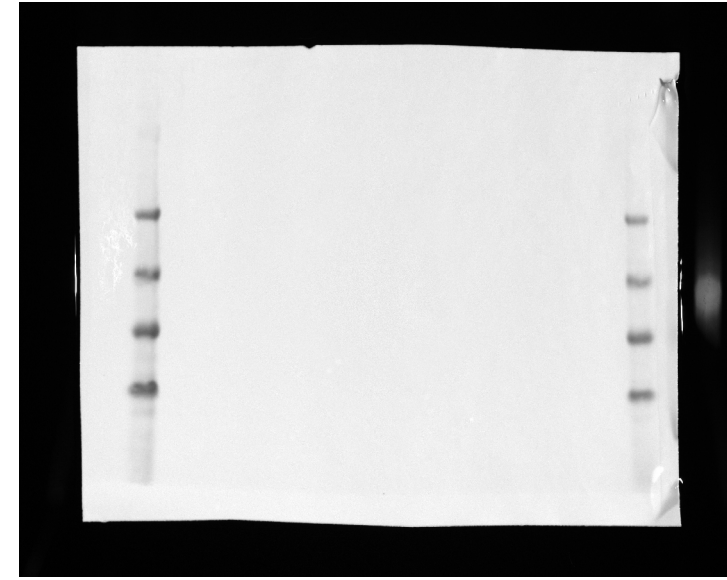

Lane: 1 2 3 4 5 6 7 8 9 10 11 12 13

ACTIN

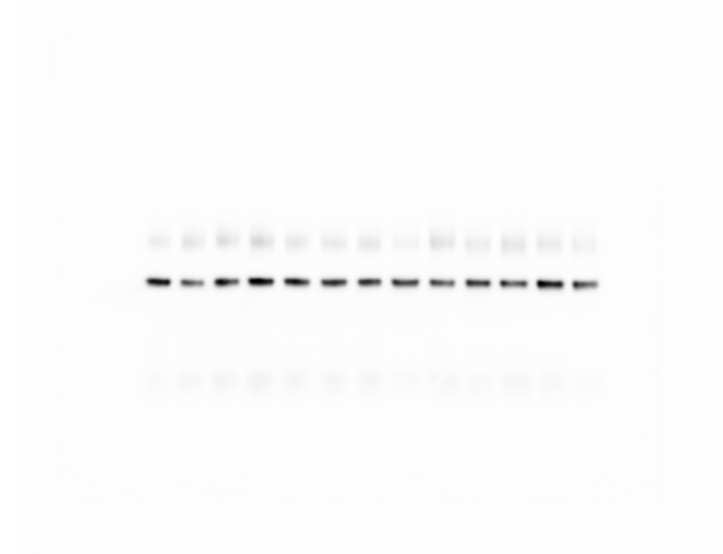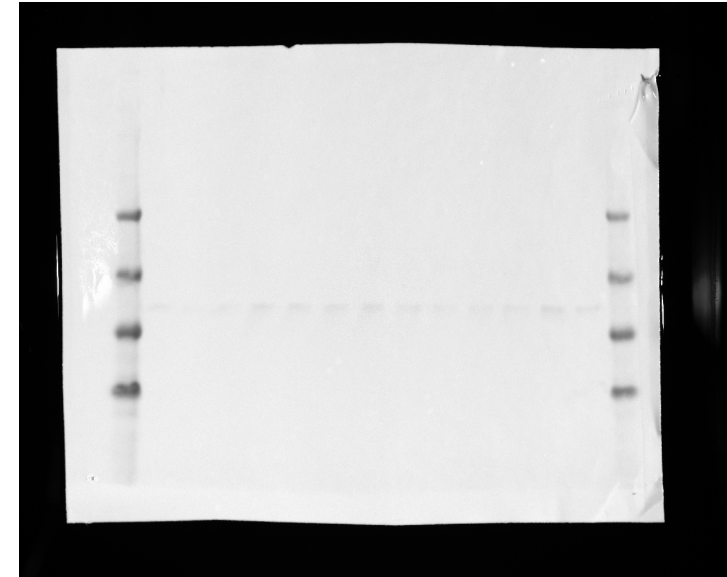

Fig. 5D

Control: lane 1-7;

GRP170-KO: lane 8-13

N=5-7

Shown in figure

Lane: 1 2 3 4 5 6 7 8 9 10 11 12 13

Brightfield

TSHR

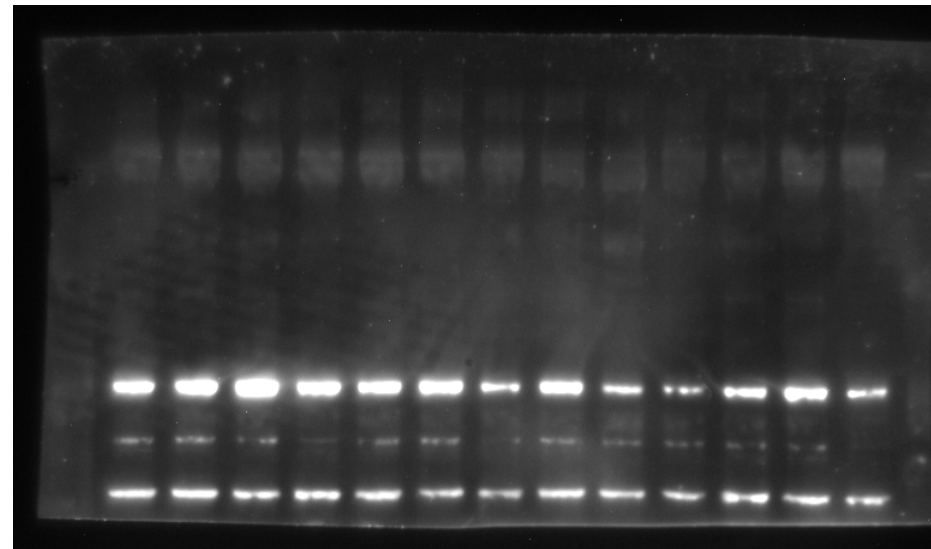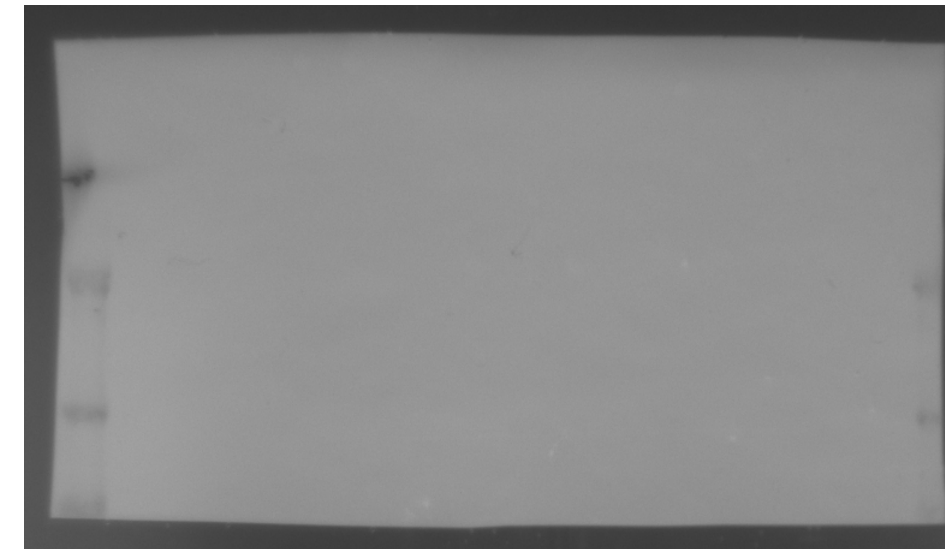

Lane: 1 2 3 4 5 6 7 8 9 10 11 12 13

ACTIN

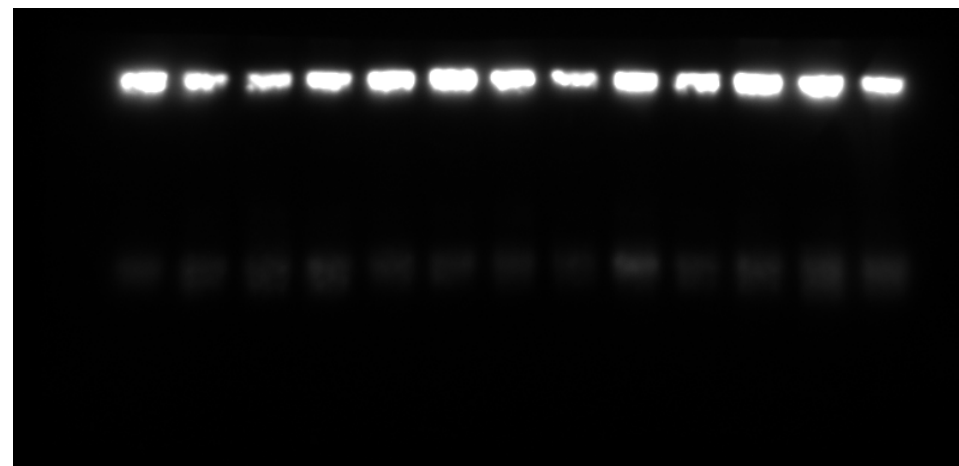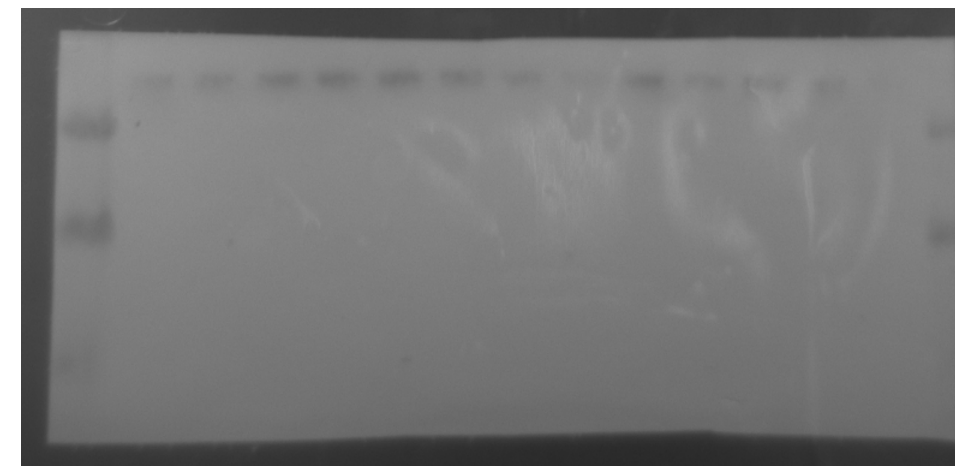

Lane 8 was an outlier.

Fig. 6A

scramble: lane 1-3; lane 7-9

GRP170-KD: lane 4-6; lane 10-12

N=3

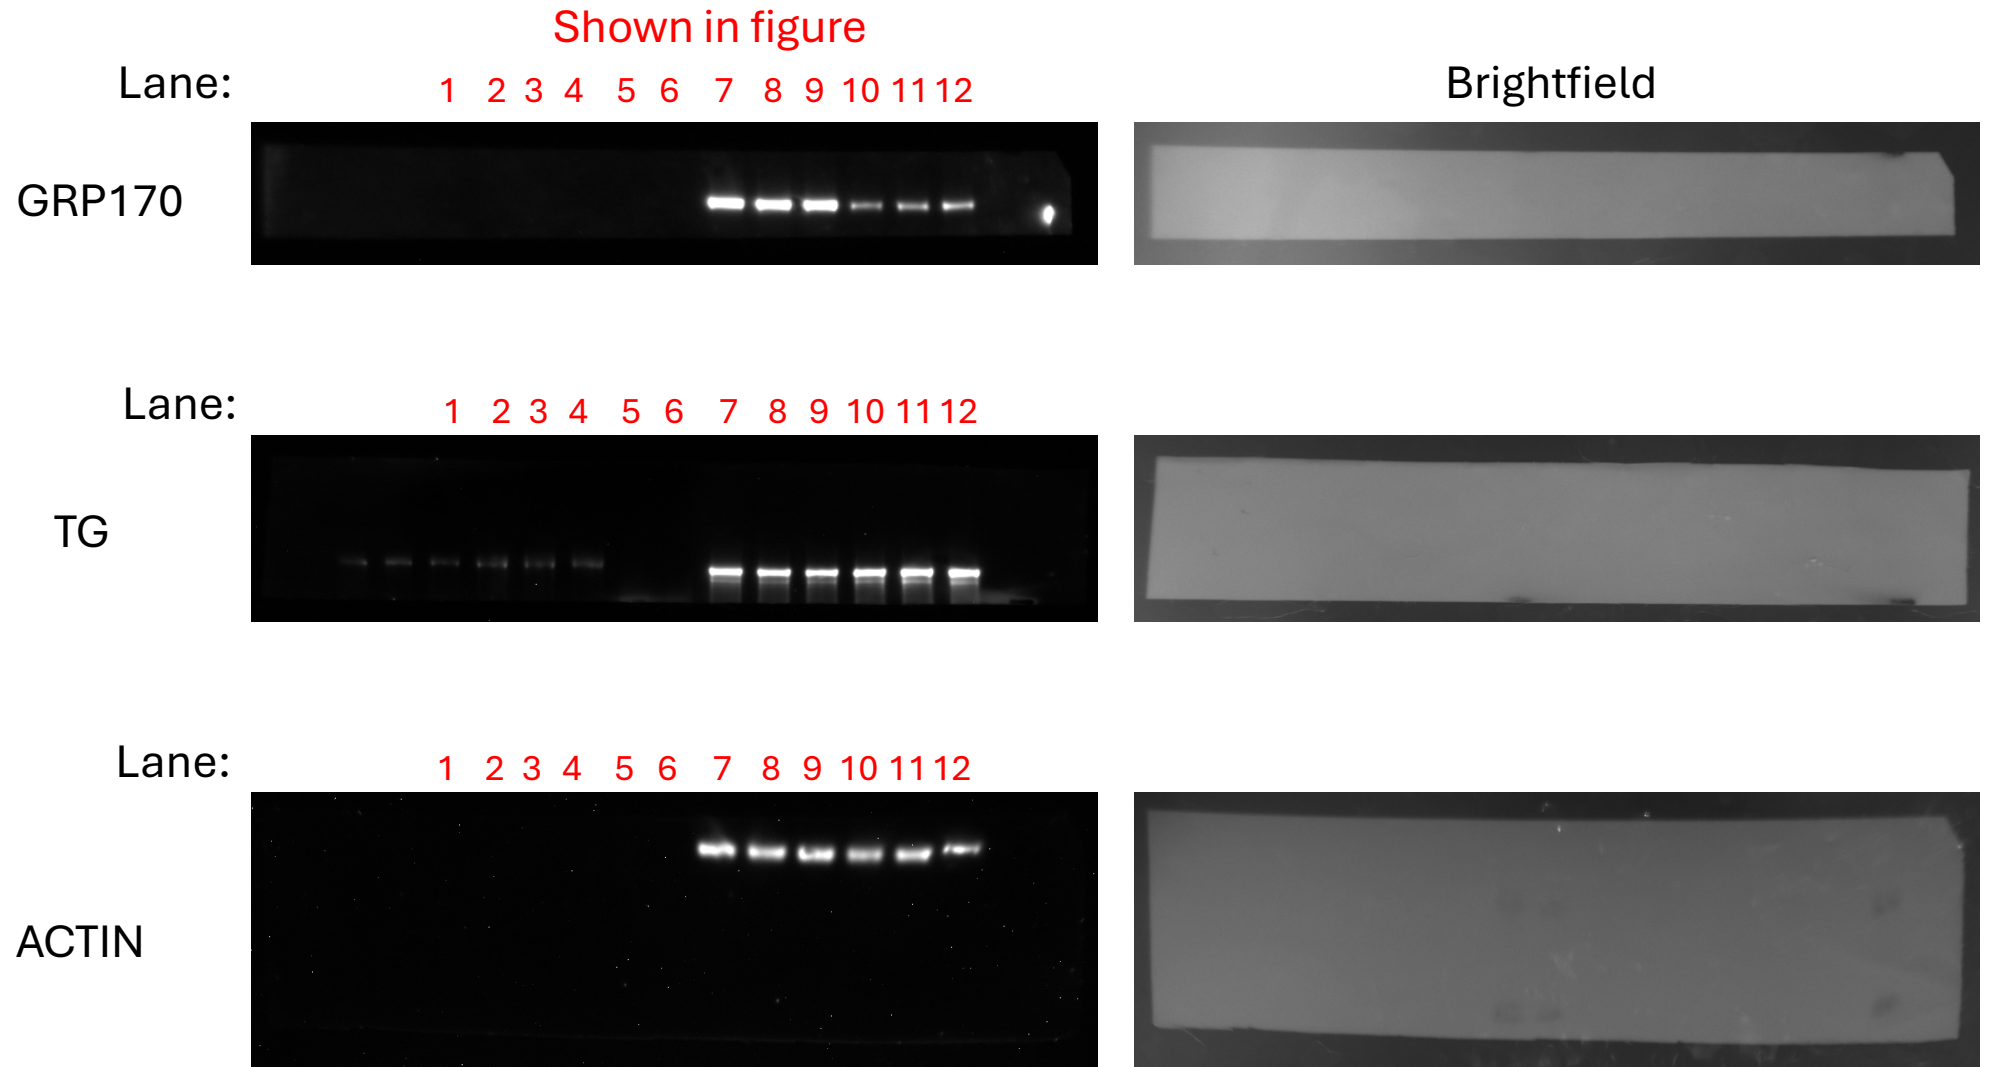

Fig. 6C

scramble: lane 1-3

GRP170-KD: lane 4-6

N=3

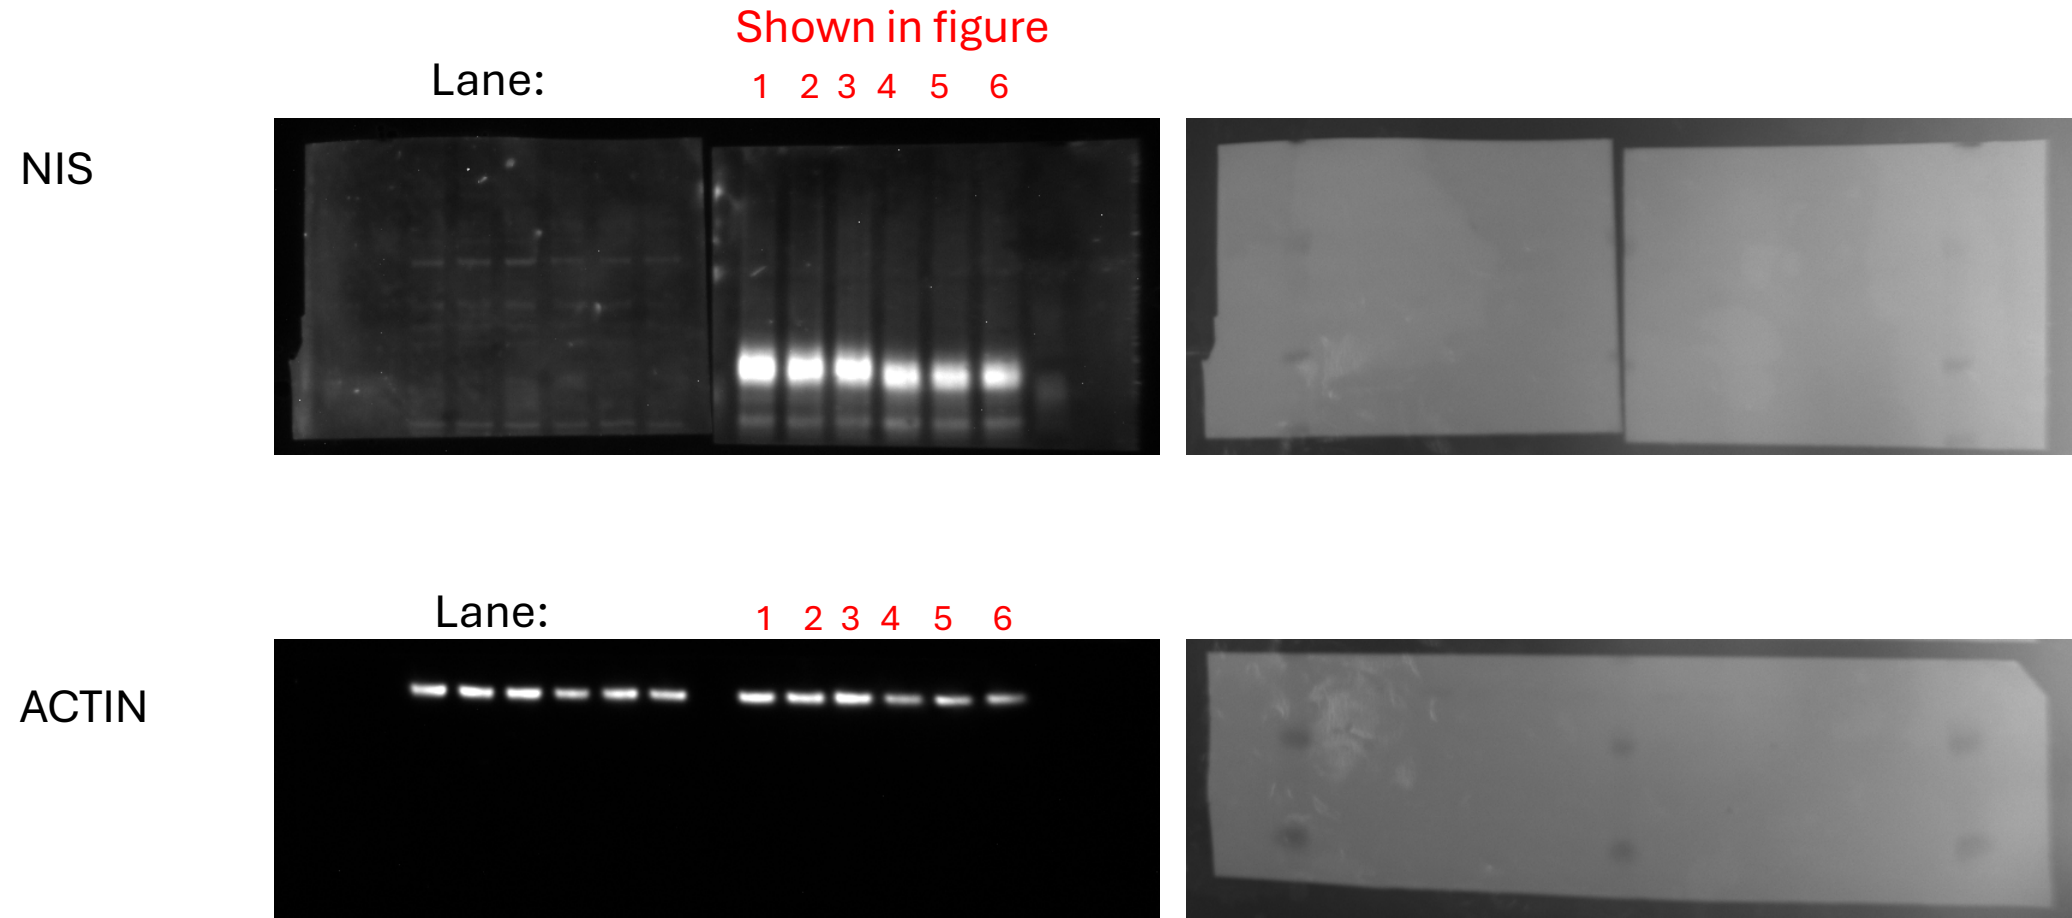

Fig. 6D

scramble: lane 1-3; lane 7-9  
GRP170-KD: lane 4-6; lane 10-12

Mock: lane 1, 4, 7, 10  
Endo H: lane 2, 5, 8, 11  
PNGase F: lane 3, 6, 9, 12

Lane 1-6 were shown in Fig. 5D.

n=4

Lane:

Shown in figure

1 2 3 4 5 6 7 8 9 10 11 12

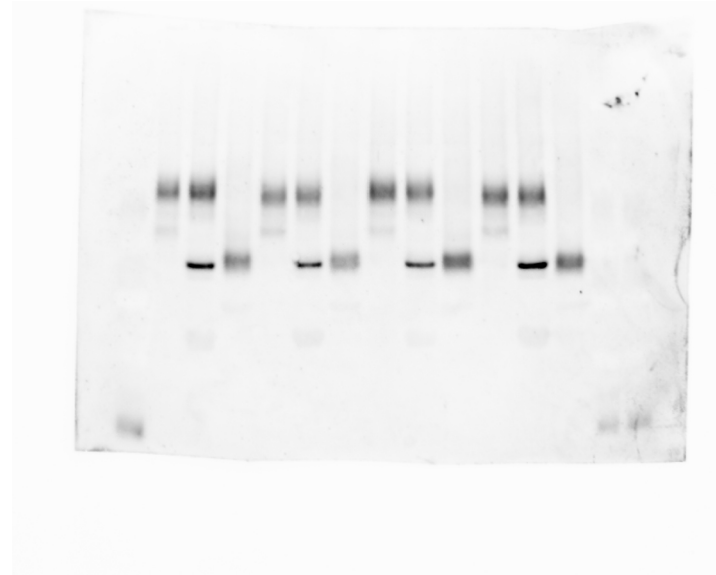

Brightfield

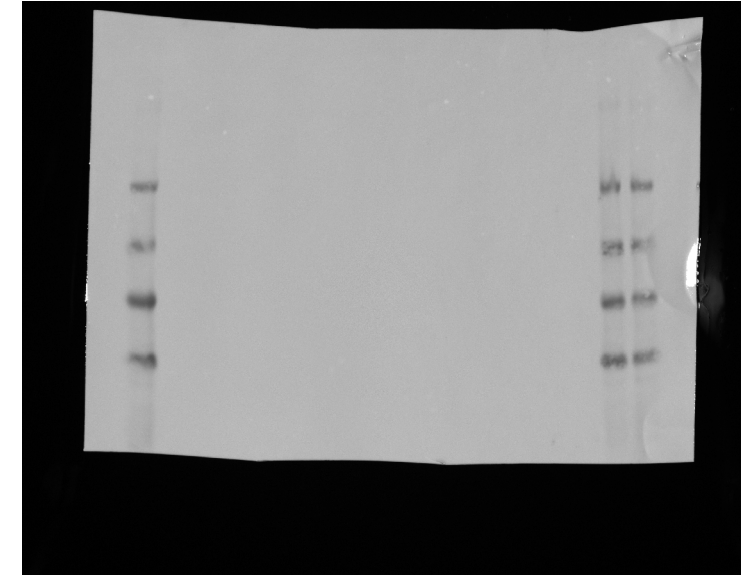

Fig. 6E N=4

Experiment 1

scramble: lane 1-2; lane 6-8

GRP170-KD: lane 3-5; lane 9-11

-TSHR: lane 1-5

+TSHR: lane 6-11

Mock: lane 1, 3, 6, 9

Endo H: lane 2, 4, 7, 10

PNGase F: lane 5, 8, 11

Shown in figure 3-8 % gel

Lane: 1 2 3 4 5 6 7 8 9 10 11

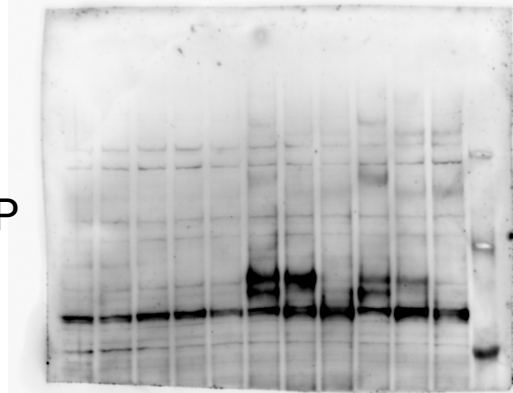

Brightfield

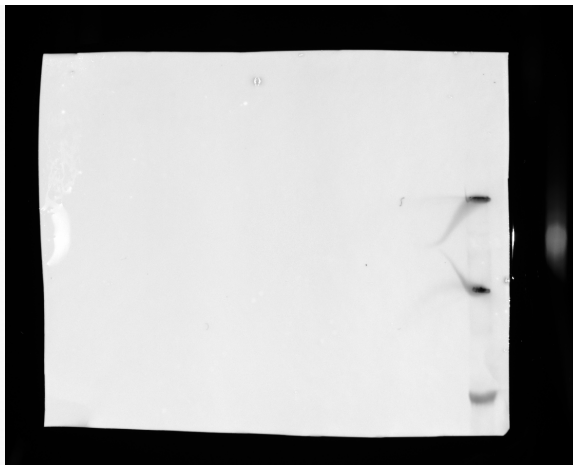

Lane: 1 2 3 4 5 6 7 8 9 10 11

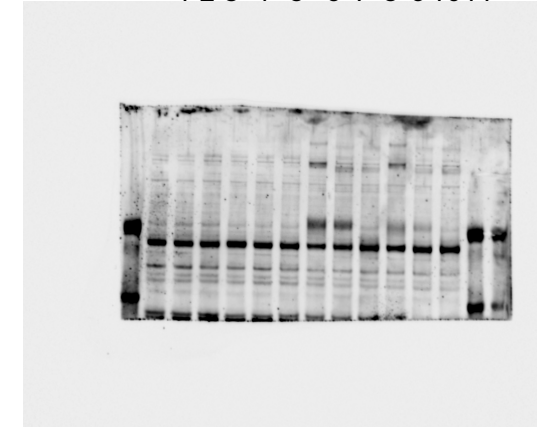

4-12 % gel

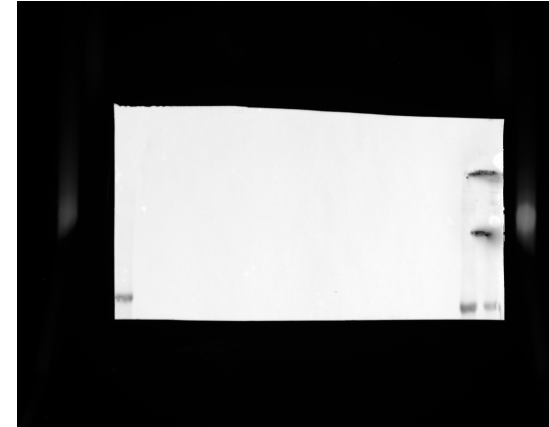

Lane: 1 2 3 4 5 6 7 8 9 10 11

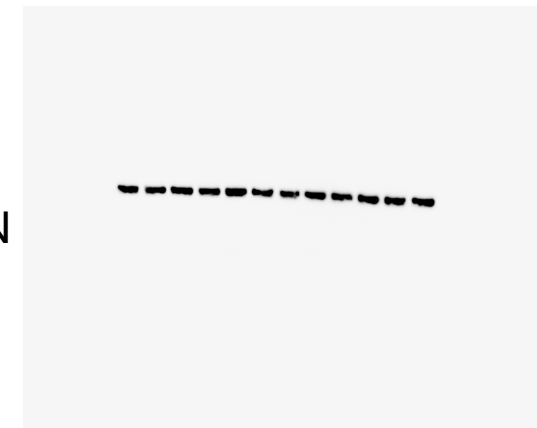

ACTIN

Brightfield

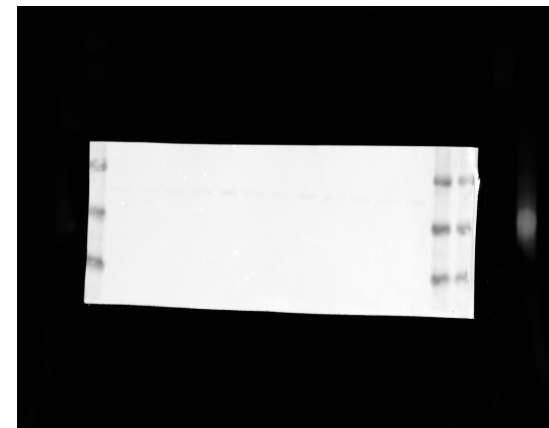

Fig. S2

scramble: lane 1-3  
GRP170-KD: lane 4-6

shown in figure

N=3

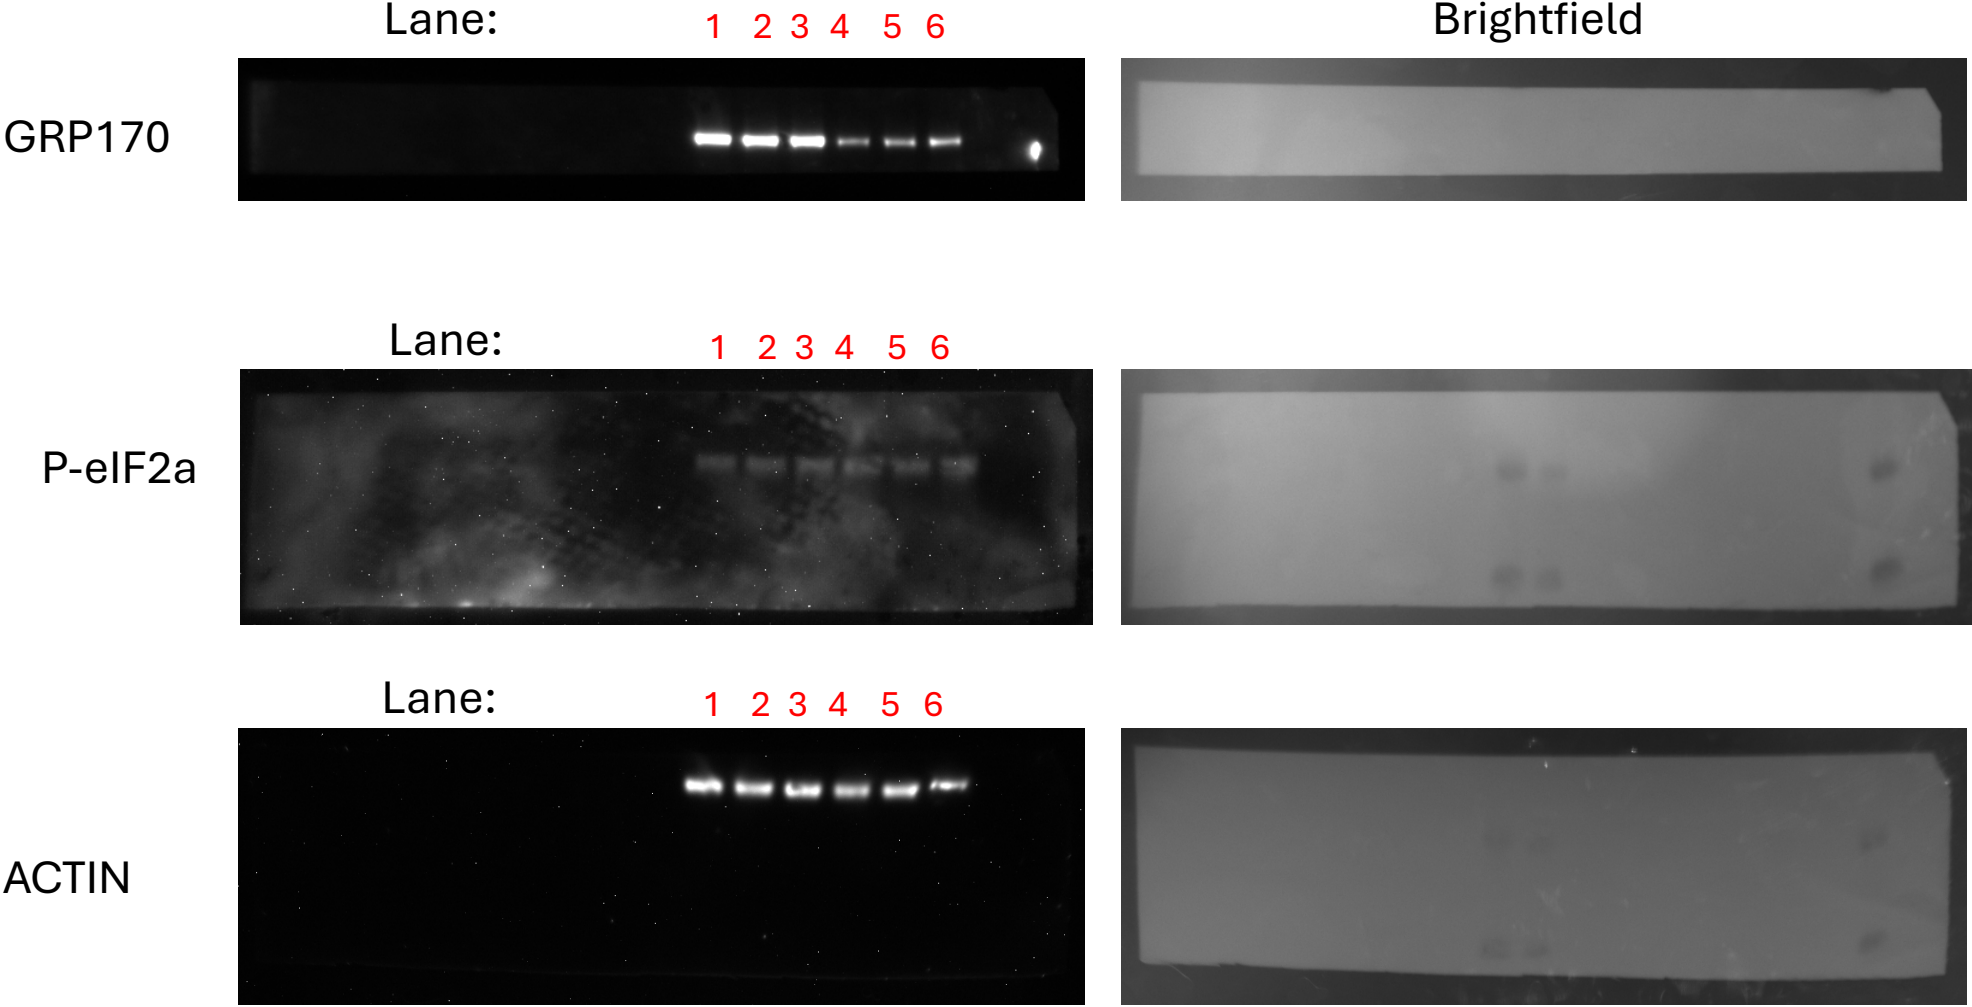

these come from the same samples (and thus same Grp170 and actin blot) as Fig. 6A

Fig. S4 N=3

Lane 1: -TSHR, scramble  
Lane 2: -TSHR, GRP170-KD  
Lane 3: +TSHR, scramble  
Lane 4: +TSHR, GRP170-KD

Experiment 1

Experiment 2

Membranes  
on this page;  
blots on final page

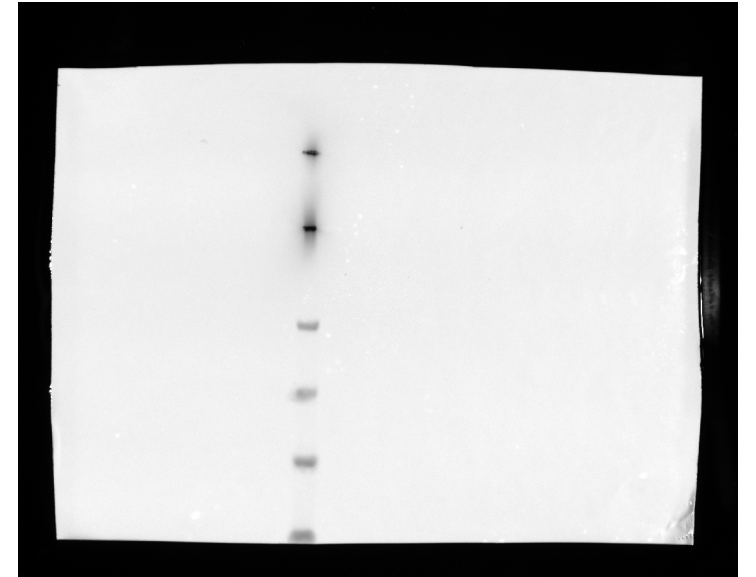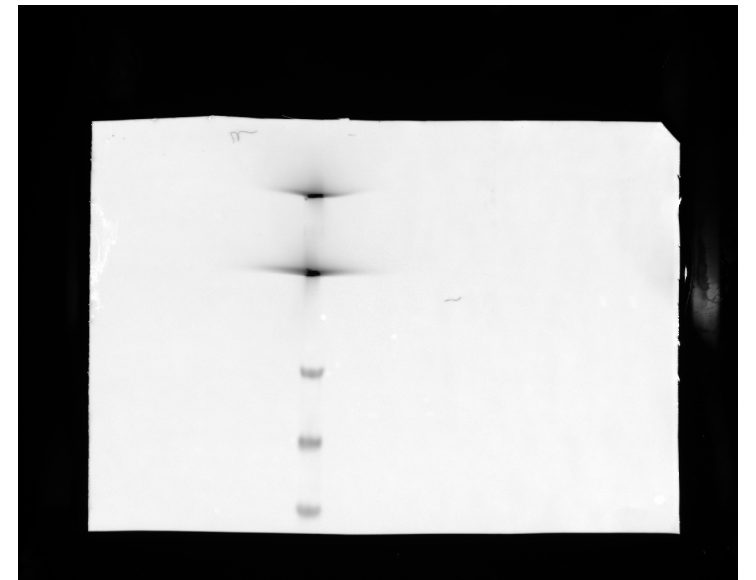

Fig. S4

- Lane 1: -TSHR, scramble
- Lane 2: -TSHR, GRP170-KD
- Lane 3: +TSHR, scramble
- Lane 4: +TSHR, GRP170-KD

Experiment 3

Membranes  
on this page;  
blots on final page

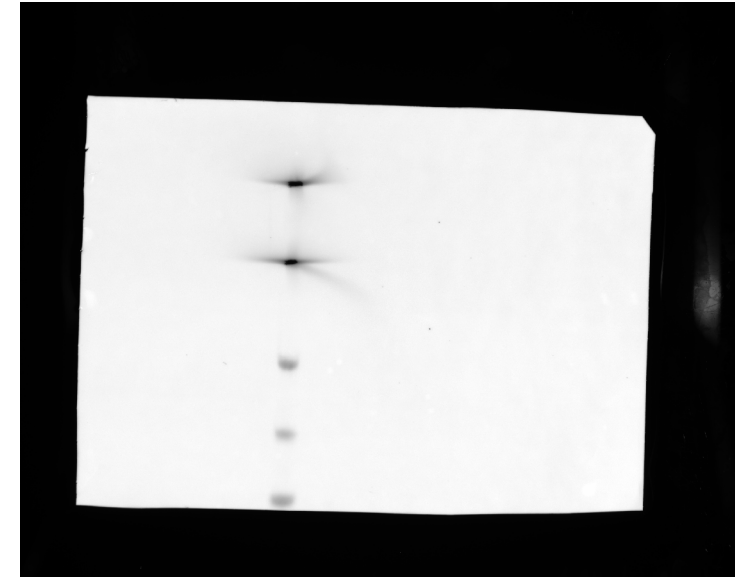

Sample:

1. negative control - no lysate
2. no TSHR, scramble
3. no TSHR, Grp170-KD
4. +TSHR, scramble
5. +TSHR, Grp170-KD

anti-GFP  
(rabbit icllabs)

### Transfection + biotinylation #1

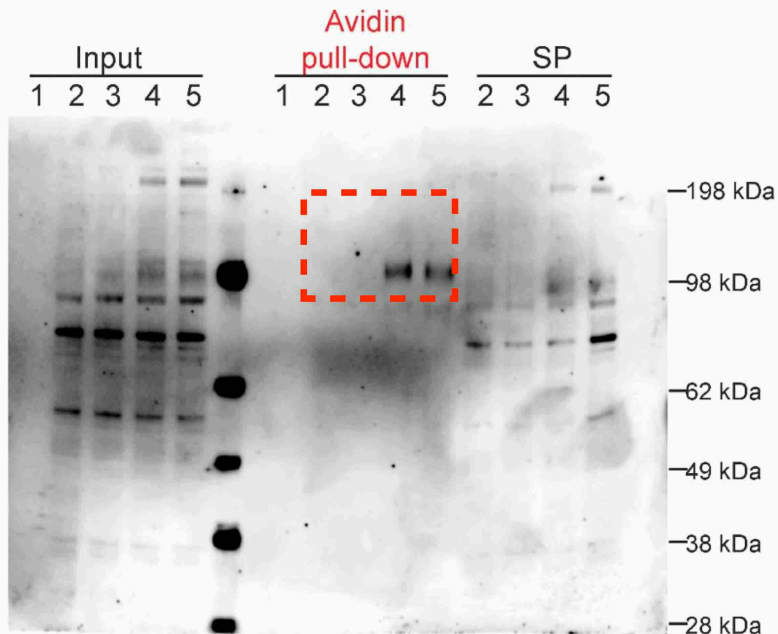

# Fig. S4

Lane:

1. negative control - no lysate
2. no TSHR, scramble
3. no TSHR, Grp170-KD
4. +TSHR, scramble
5. +TSHR, Grp170-KD

anti-GFP  
(rabbit icllabs)

### Transfection + biotinylation #2

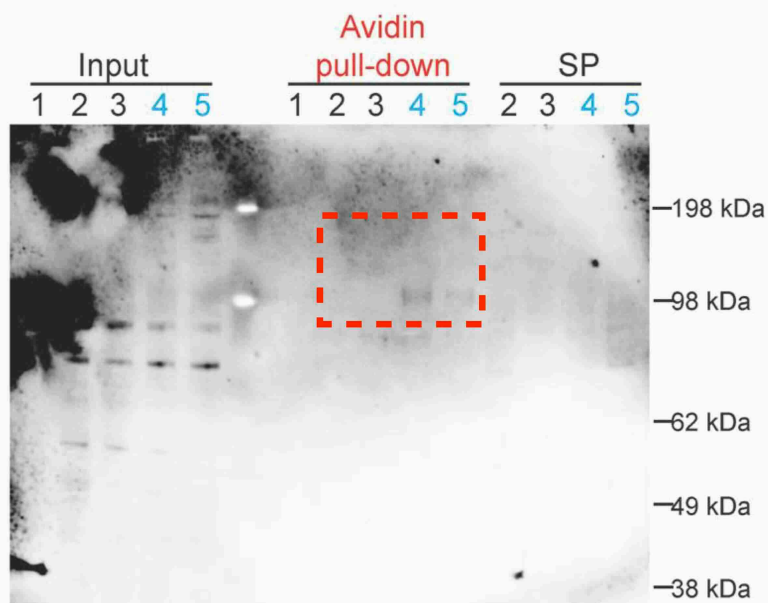

Lane:

1. negative control - no lysate
2. no TSHR, scramble
3. no TSHR, Grp170-KD
4. +TSHR, scramble
5. +TSHR, Grp170-KD

anti-GFP  
(rabbit icllabs)

### Transfection + biotinylation #3

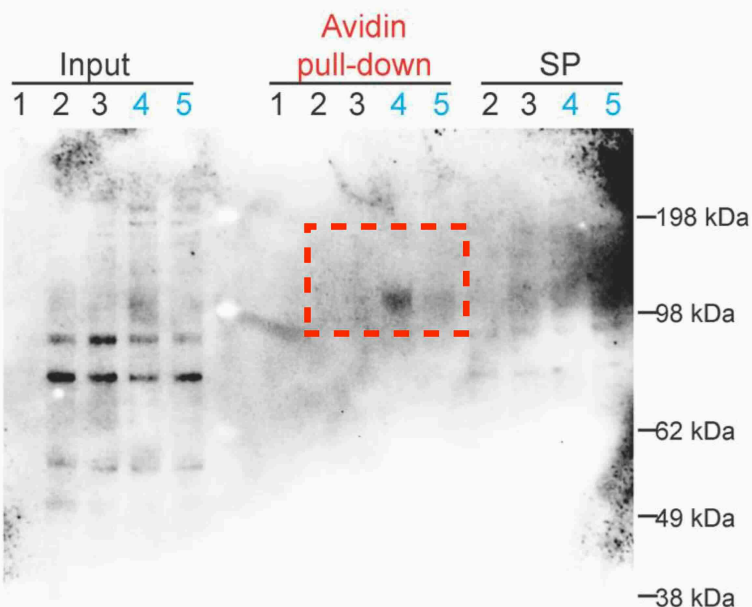

Supplement: sd2 [file 2]
